# Supplementary material for: Architecture of a SARS-CoV-2 mini replication and transcription complex
Source: PubMed Central journal article supplement (PMC7675986; doi:10.1038/s41467-020-19770-1), 2020-11-18
Supplement: 41467_2020_19770_MOESM1_ESM.pdf [file 41467_2020_19770_MOESM1_ESM.pdf]

## **Supplementary Information for:**

### **Architecture of a SARS-CoV-2 mini replication and transcription complex**

*Yan et al.*

| <b>Contents</b>                                                                                                                                                 | <b>Page</b> |
|-----------------------------------------------------------------------------------------------------------------------------------------------------------------|-------------|
| <b>Supplementary Figures</b> .....                                                                                                                              | <b>2</b>    |
| Supplementary Figure 1 .....                                                                                                                                    | 2           |
| Supplementary Figure 2 .....                                                                                                                                    | 3           |
| Supplementary Figure 3 .....                                                                                                                                    | 5           |
| Supplementary Figure 4 .....                                                                                                                                    | 6           |
| Supplementary Figure 5 .....                                                                                                                                    | 7           |
| Supplementary Figure 6 .....                                                                                                                                    | 8           |
| Supplementary Figure 7 .....                                                                                                                                    | 9           |
| Supplementary Figure 8 .....                                                                                                                                    | 10          |
| <b>Supplementary Tables</b> .....                                                                                                                               | <b>11</b>   |
| Supplementary Table 1. Cryo-EM data statistics.....                                                                                                             | 11          |
| Supplementary Table 2. Interactions of nsp13 with nsp7-nsp8-nsp12 complex. ....                                                                                 | 12          |
| Supplementary Table 3. Interactions of nsp13-1 and nsp13-2. ....                                                                                                | 12          |
| Supplementary Table 4. Comparison of H/D exchange mass spectrometry (HDX MS) of nsp13-RNA <sup>a</sup> and structural interactions of nsp13-template RNA . .... | 13          |
| Supplementary Table 5. List of primers used for SARS-CoV-2 protein expression .....                                                                             | 13          |
| <b>Supplementary References</b> .....                                                                                                                           | <b>14</b>   |

## Supplementary Figures

### Supplementary Figure 1

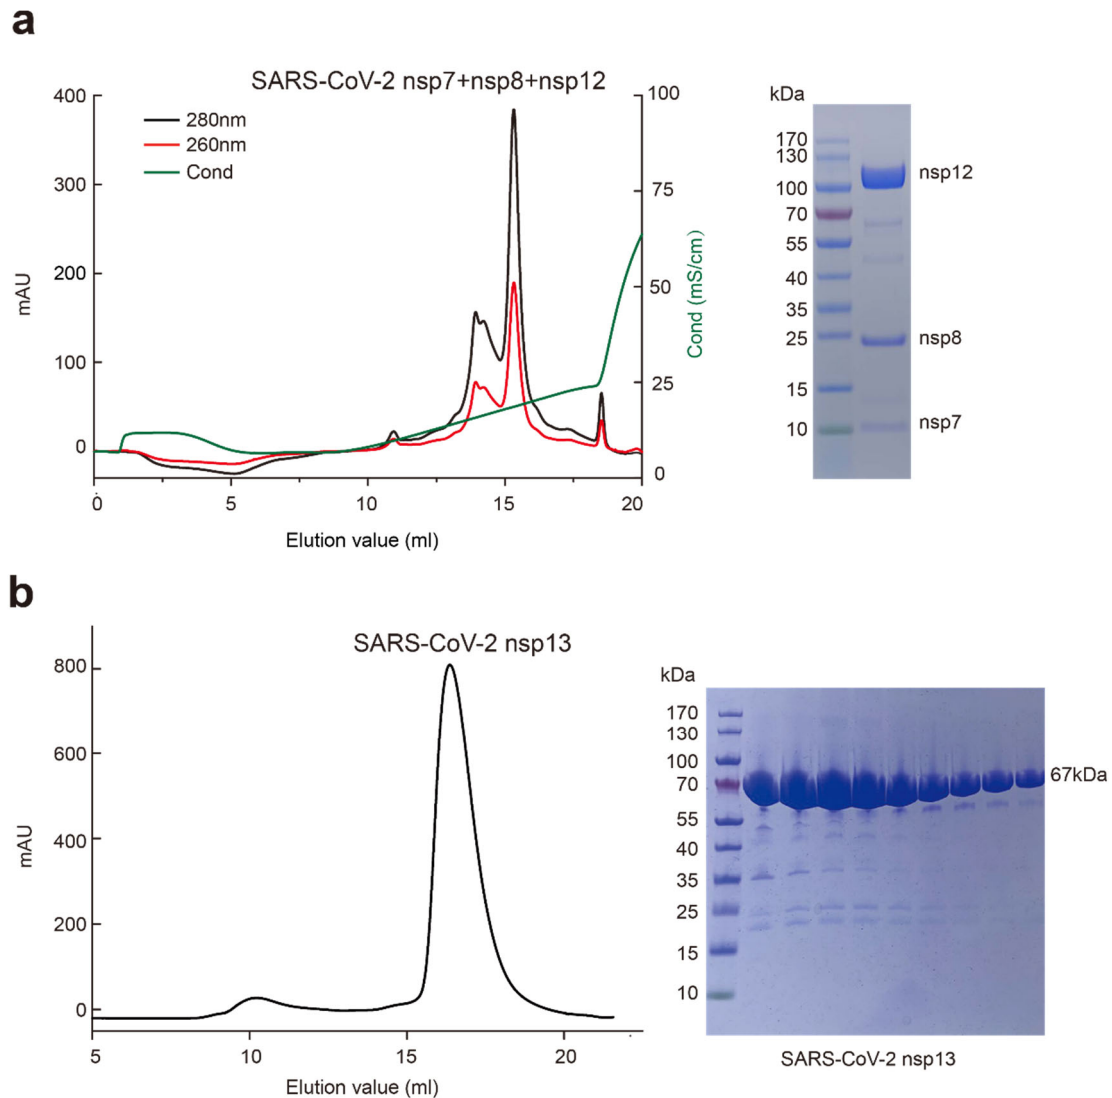

**Supplementary Figure 1. The purification of SARS-CoV-2 nsp12-nsp7-nsp8 complex and nsp13.** Anion exchange chromatography of the nsp12-nsp7-nsp8 complex **(a)** and size-exclusion chromatogram of the affinity-purified SARS-CoV-2 nsp13 **(b)**. Data from a mono-Q 5/50 **(a)** and Superdex 200 10/30 column **(b)** are shown in black. The target proteins were analyzed by the SDS-PAGE. The standard protein markers are shown lane with labels. The lane labels in the SDS-PAGE with blue color indicate the peak positions. All proteins and nsp12-nsp7-nsp8 complex can be stably expressed and purified and the data presented are repeated at least three times with similar results.

# Supplementary Figure 2

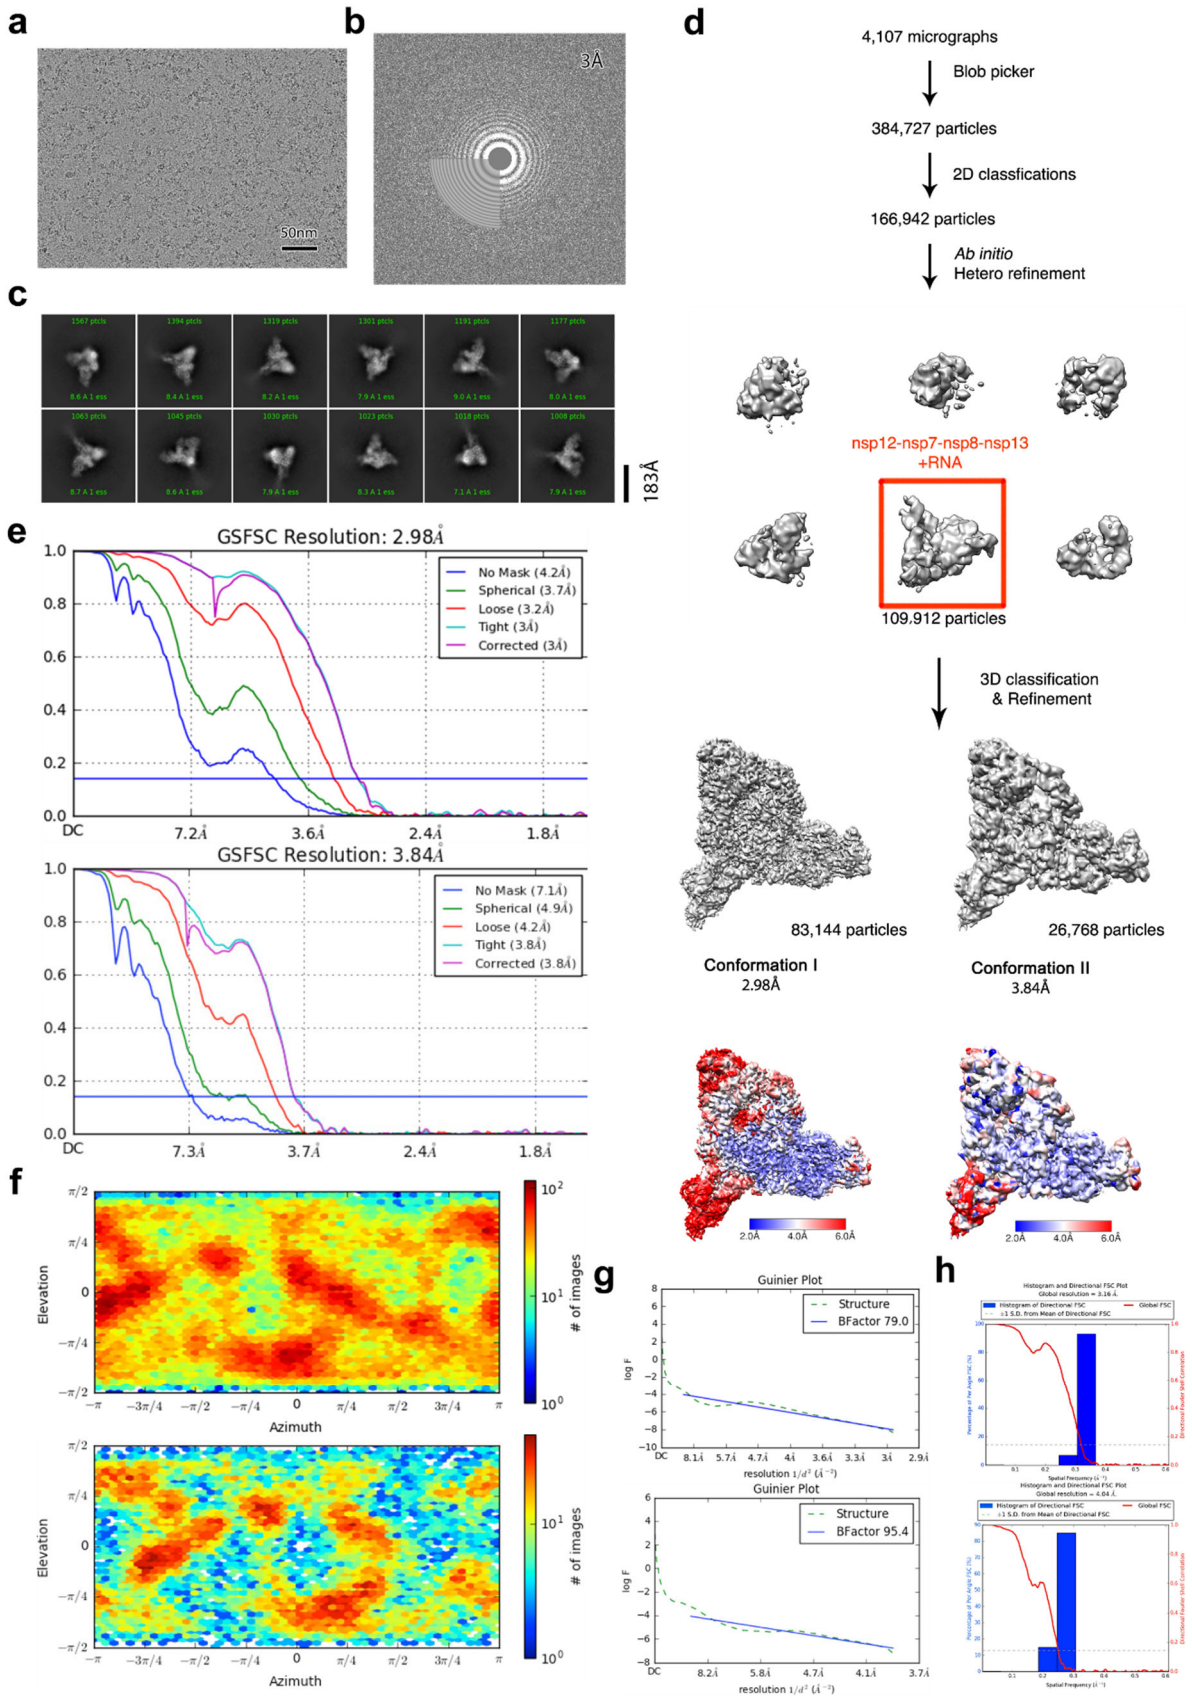

**Supplementary Figure 2. Cryo-EM reconstruction.** (a) Raw image of SARS-CoV-2 nsp7-8<sub>2</sub>-12-13<sub>2</sub> complex particles in vitreous ice recorded at defocus values of -2.0 to -1.0  $\mu\text{m}$ . Scale bar is 50 nm. (b) Power spectrum of the image shown in (a), with plot of the rotationally averaged intensity versus resolution. White circle indicates the spatial frequency corresponding to 3.0  $\text{\AA}$  resolution. (c) Representative class averages. The edge of each square is 386  $\text{\AA}$ , approximately. (d) The data processing scheme used to obtain the final map and the overview of SARS-CoV-2 nsp7-8<sub>2</sub>-12-13<sub>2</sub> complex density maps in 2 conformations. Local resolutions are colored in blue-grey-red as shown in color key. (e) Golden-Standard fourier shell correlations (GSFSC) of the final 3D reconstruction following gold standard refinement. FSC curves are plotted before (red) and after (green) masking in addition to post-correction (blue), accounting for the effect of the mask using phase randomization. (f) The viewing direction distributions. (g) Map-sharpening B-factor is estimated in Guinier plots. (h) The 3DFSC sphericity was analyzed with threeDFSC in cryoSPARC. Subfigure e, f, g, h are plotted from dataset of conformation I and II, respectively. The data presented are repeated at least three times with similar results.

### Supplementary Figure 3

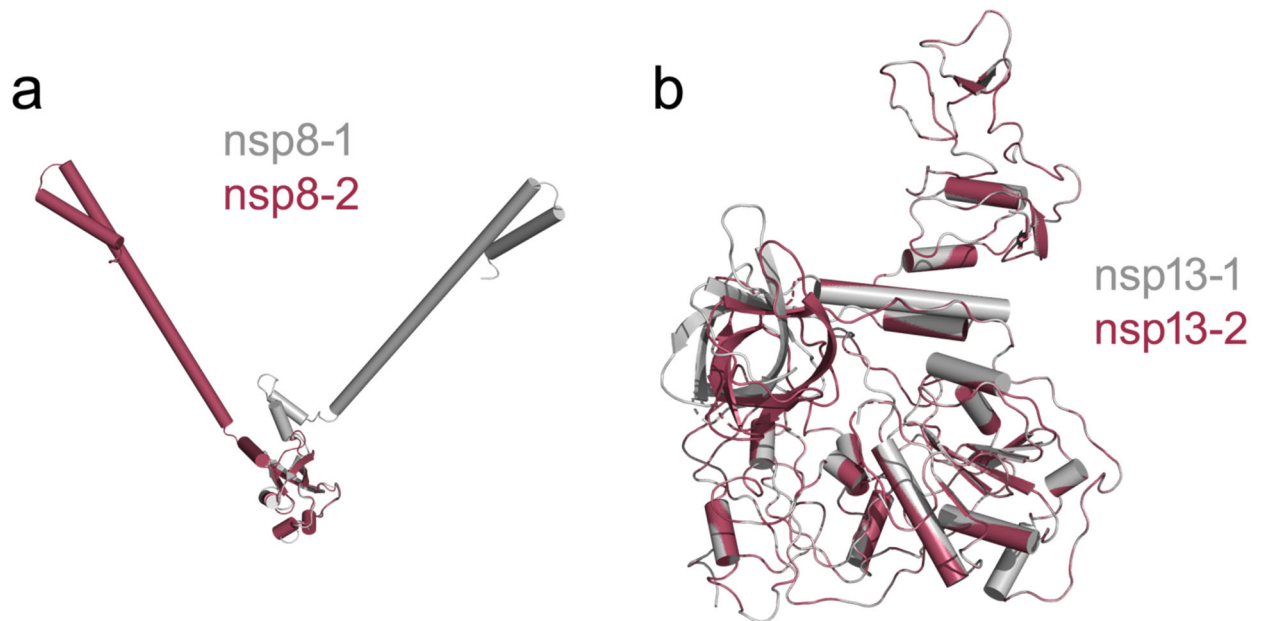

### Supplementary Figure 3. Comparison of nsp8 and nsp13 molecules in the mini RTC.

The structures of two nsp8 molecules (a) and two nsp13 molecules are aligned (b) and shown in the same orientation. Structures of nsp8 and nsp13 are shown by using they are in form 1 mini RTC as representative.

## Supplementary Figure 4

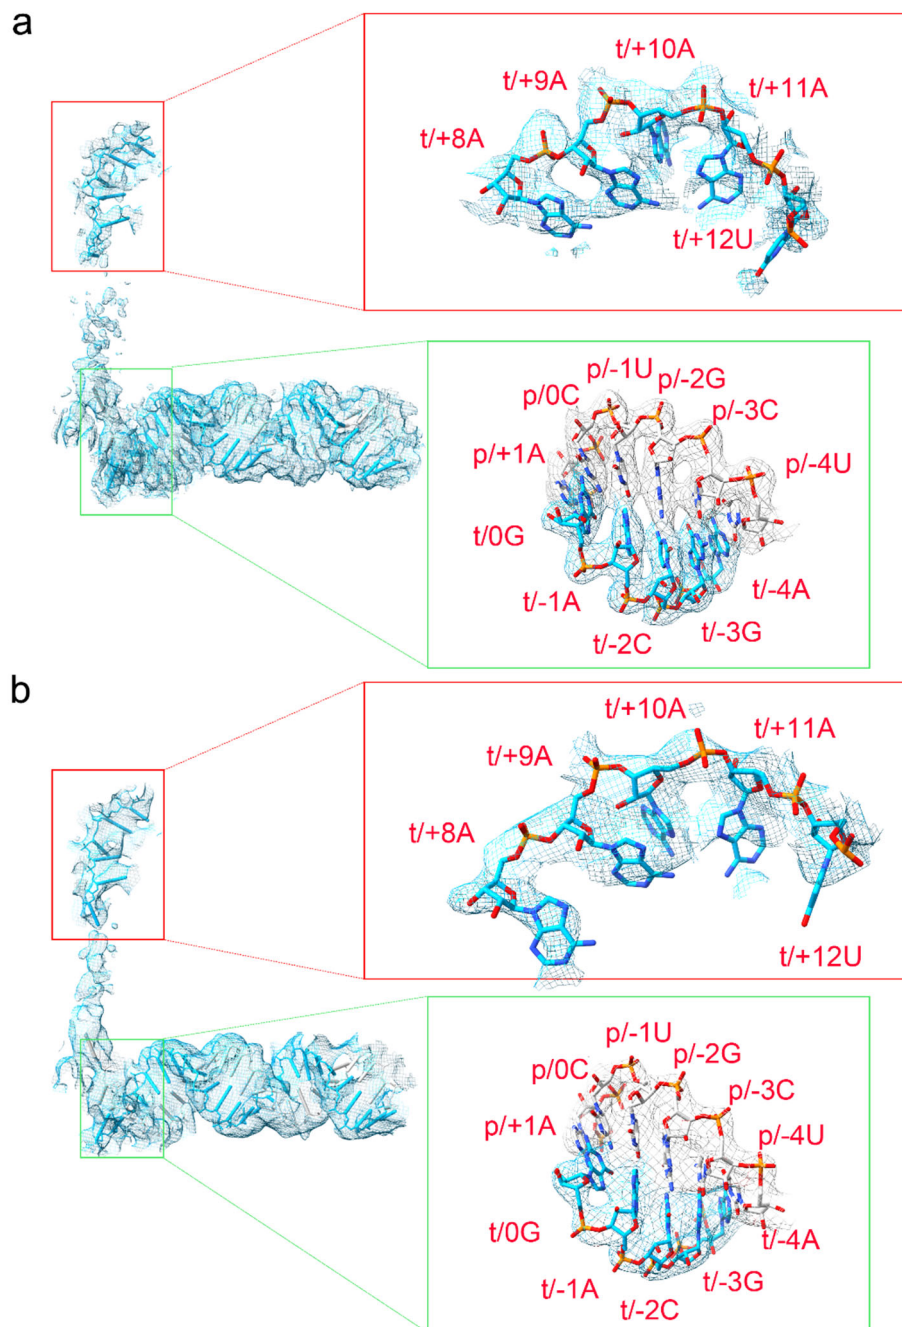

**Supplementary Figure 4. Densities RNA bound in mini RTC.** RNA bound to form 1 (**a**) and form 2 (**b**) mini RTCs are shown as colored stick with the color scheme in Figure 1. The cryo-EM densities covering RNA are displayed as grey meshes. Enlarged parts are presented in the right panels. The sigma levels used in (**a**): left panel, 4.95 rmsd; upper right



panel, 4.31 rmsd; bottom right panel, 8.61 rmsd. The sigma levels used in **(b)**: left panel, 5.41 rmsd; upper right panel, 8.11 rmsd; bottom right panel, 13.52 rmsd.

### Supplementary Figure 5

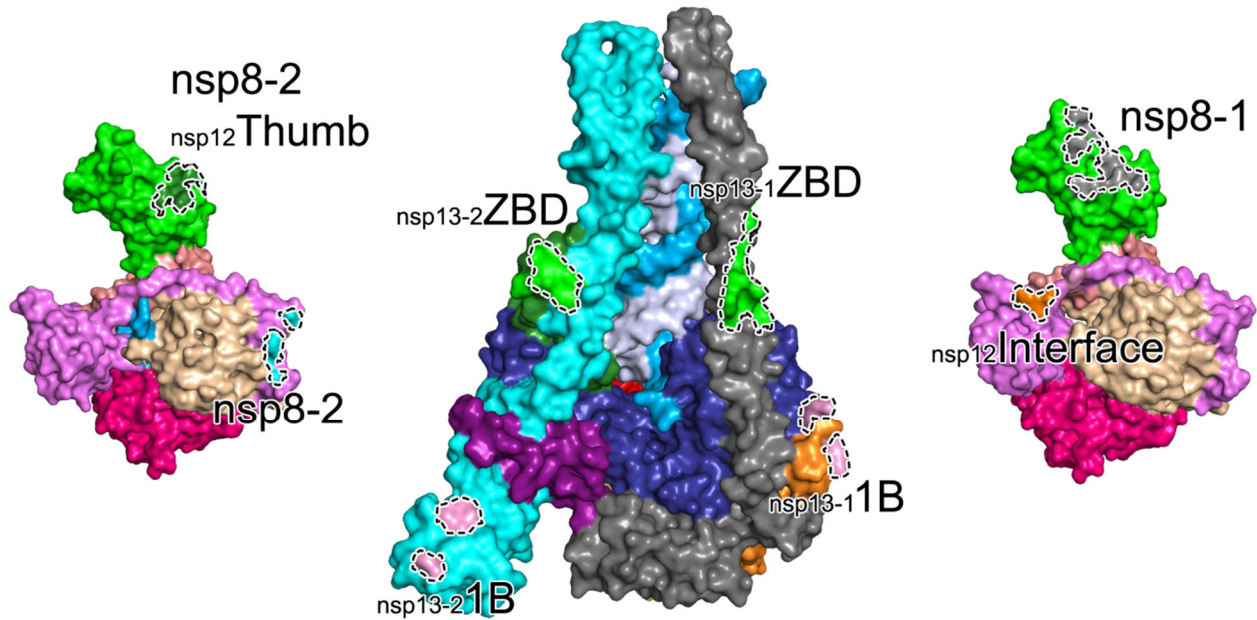

**Supplementary Figure 5. Interaction between two nsp13 molecules and nsp7-nsp8-nsp12.** All proteins are covered by molecular surface with the same color scheme in Figure 1. The interfaces on each protein are framed out with the colors of their interacting partners. The labels indicate the interacting partners of the corresponding regions.

## Supplementary Figure 6

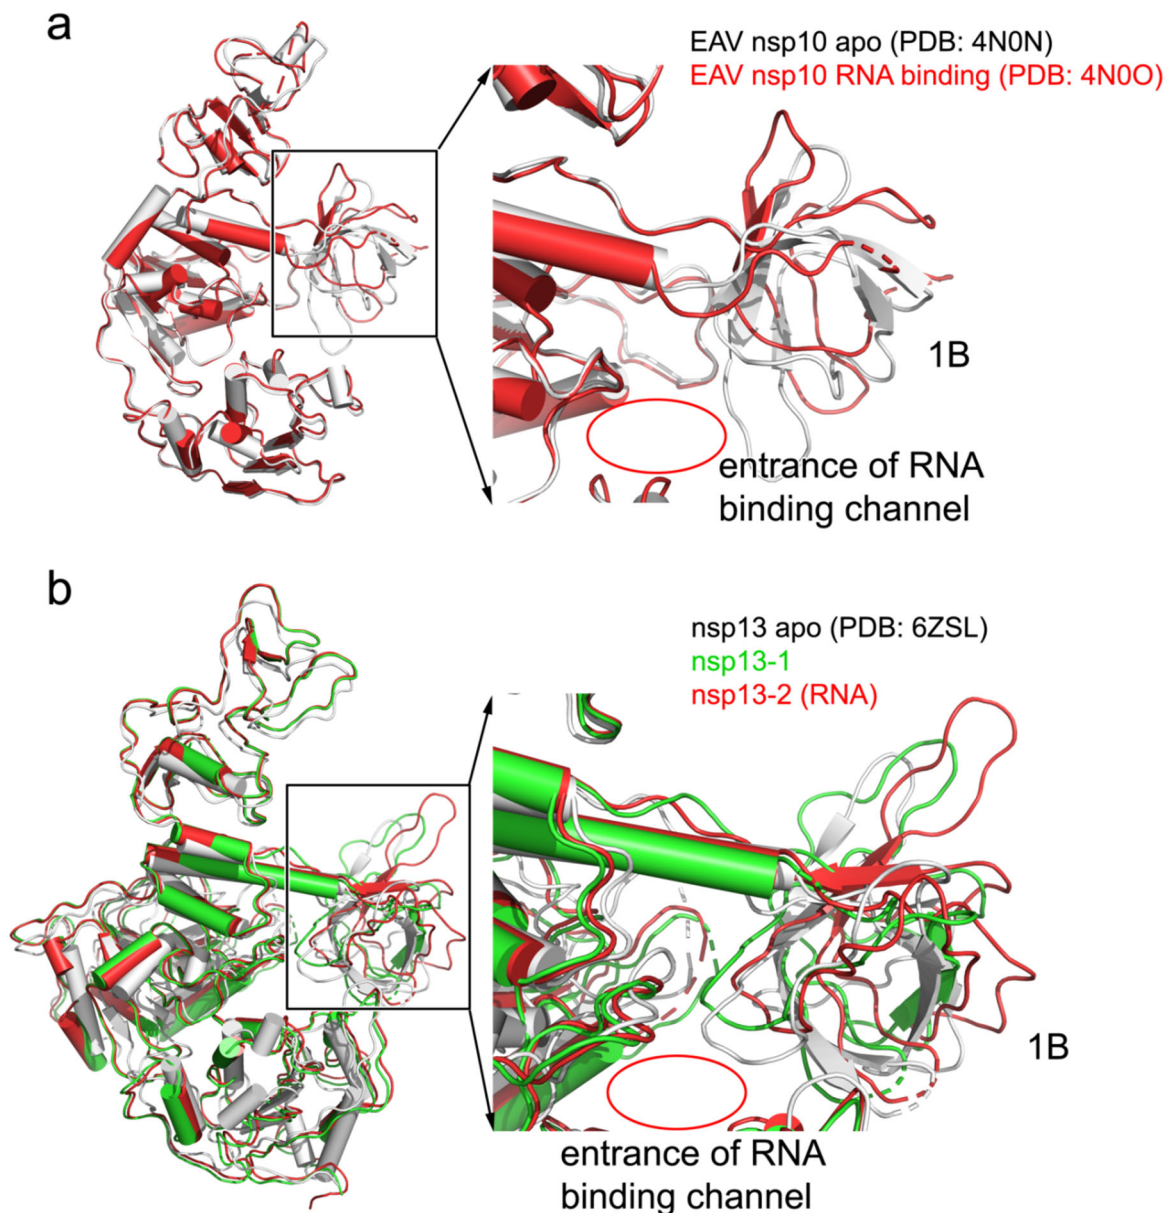

**Supplementary Figure 6. Comparison of nidoviral helicases.** (a) Structures of EAV helicase (nsp10) in apo form (PDB: 4N0N) and in RNA binding form (PDB: 4N0O)<sup>1</sup>, and (b) structures of SARS-CoV-2 nsp13 in apo form (PDB: 6ZSL), nsp13-1 and nsp13-2 in the mini RTC, are aligned and shown in the same orientation. Framed parts are enlarged in the right panels.



## Supplementary Figure 7

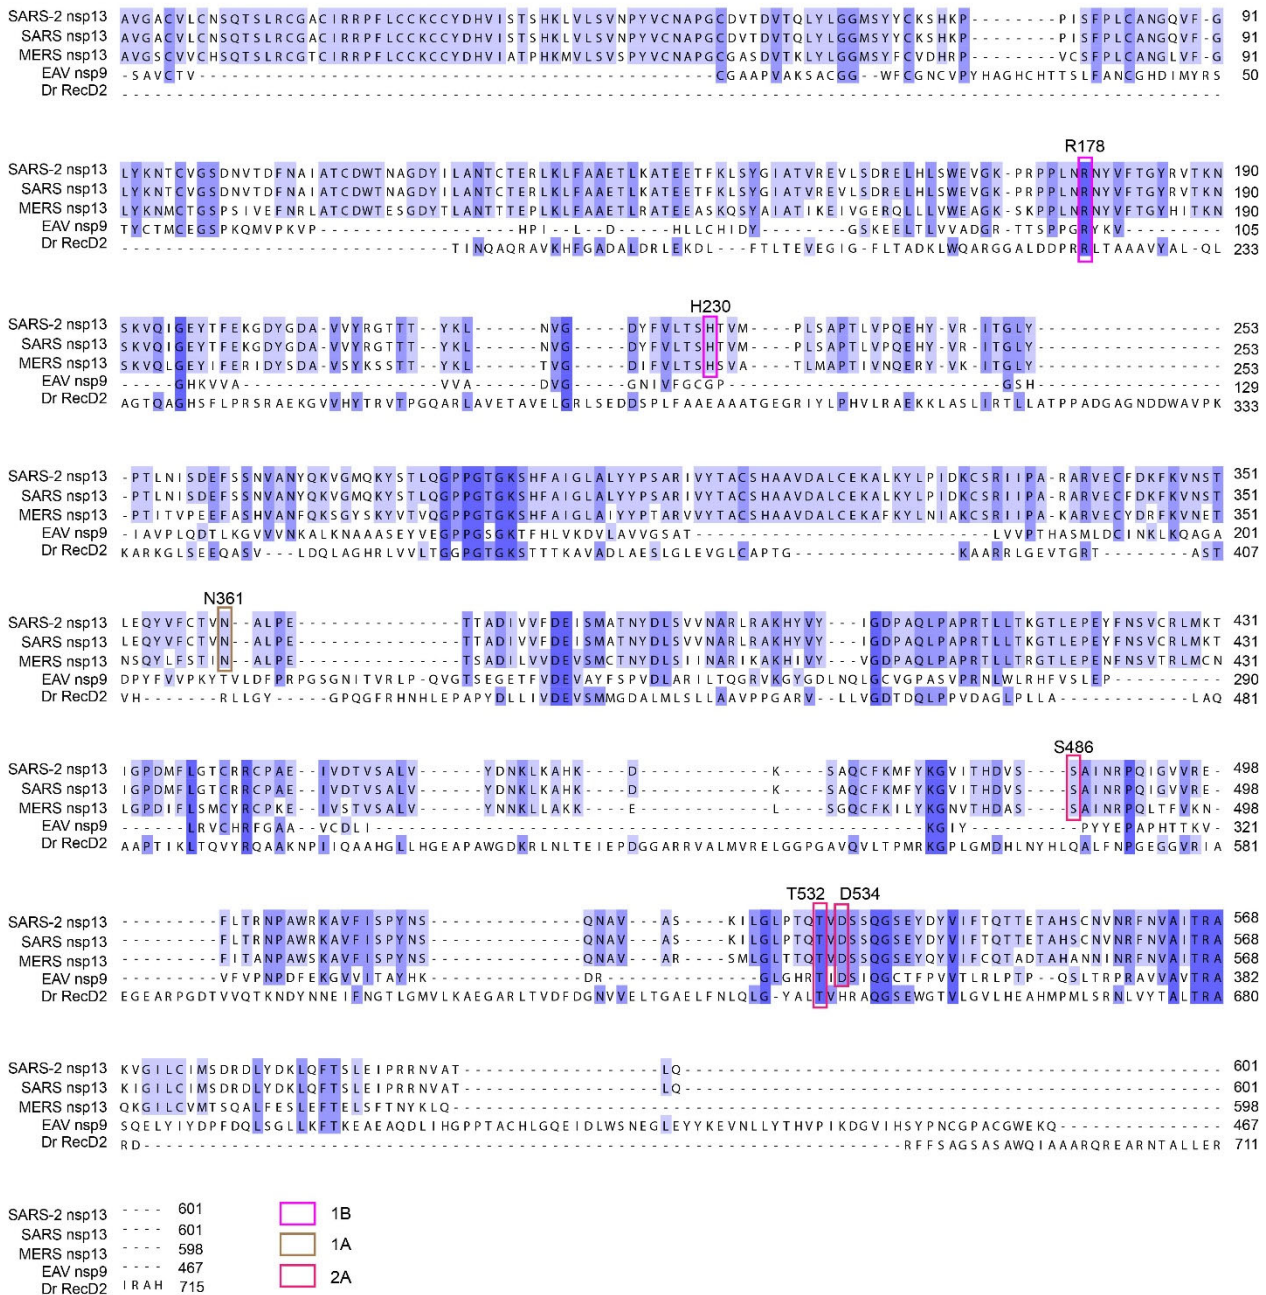

**Supplementary Figure 7.** Sequence alignment of the helicases in different species, helicase nsp13 encoded by SARS-CoV-2, SARS-CoV, MERS-CoV, nsp9 helicase from EAV and RecD2 of *Deinococcus radiodurans*. The residues with blue, light blue or white backgrounds indicate the identical, conserved or non-conserved residues. Nsp13 conservative residues are also indicated with the same color scheme as that in Figure 1b.

## Supplementary Figure 8

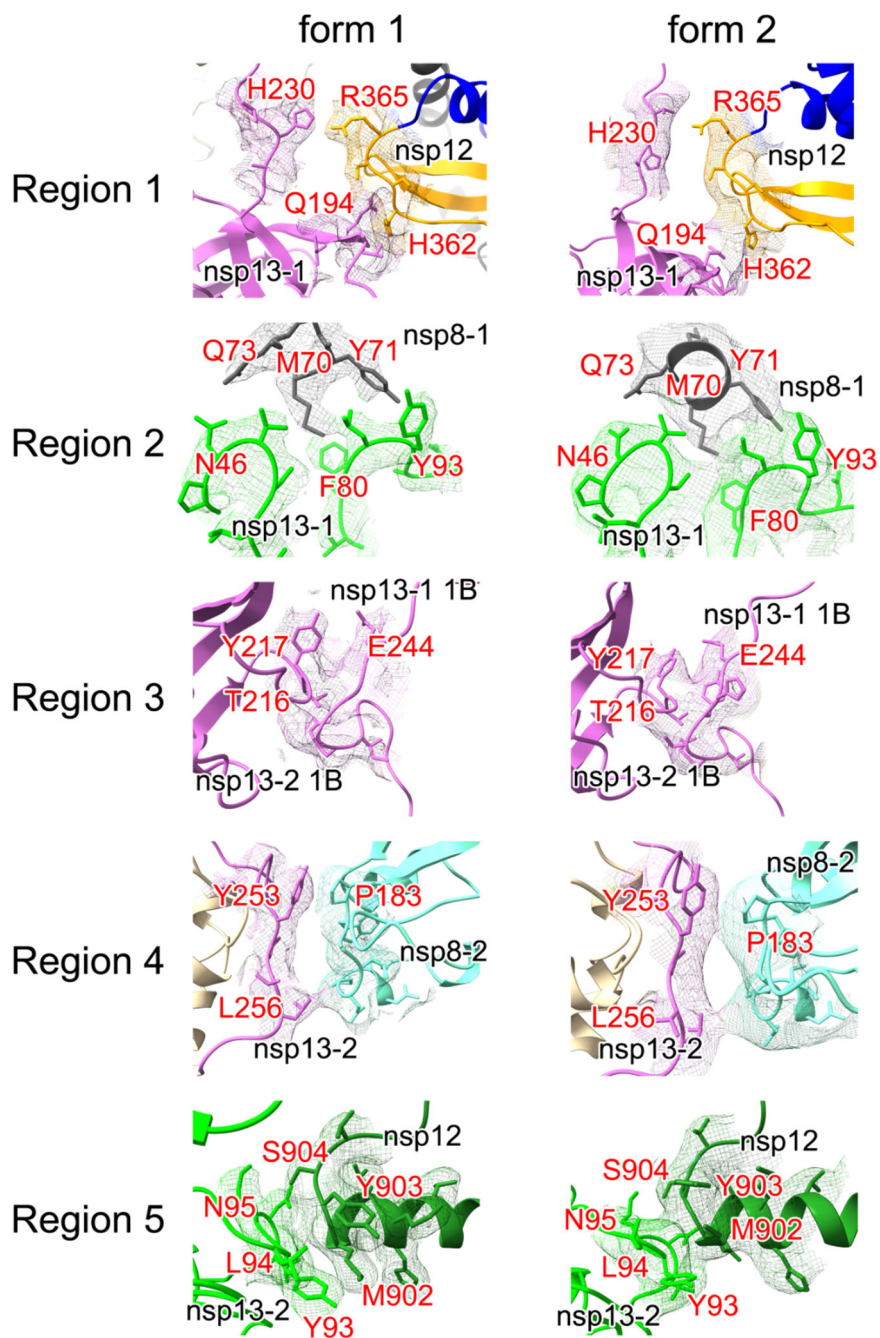

**Supplementary Figure 8. Densities for the interaction regions (related to Figure 3).** Interaction regions 1-5 in form 1 and form 2 mini RTC are covered by cryo-EM densities. The color scheme is same as in Figure 3. The cryo-EM densities are shown as colored meshes.

## Supplementary Tables

**Supplementary Table 1. Cryo-EM data statistics**

|                                                     | Form 1       | Form 2       |
|-----------------------------------------------------|--------------|--------------|
| <b>Data collection and processing</b>               |              |              |
| Magnification                                       | 290,000x     | 290,000x     |
| Voltage (kV)                                        | 300          | 300          |
| Electron exposure (e <sup>-</sup> /Å <sup>2</sup> ) | 60           | 60           |
| Defocus range (μm)                                  | -2.0 to -1.0 | -2.0 to -1.0 |
| Pixel size (Å)                                      | 0.82         | 0.82         |
| Symmetry imposed                                    | C1           | C1           |
| Initial particle images (no.)                       | 384,727      | 384,727      |
| Final particle images (no.)                         | 83,144       | 26,768       |
| Map resolution (Å)                                  | 2.98         | 3.84         |
| FSC threshold                                       | 0.143        | 0.143        |
| Map resolution range (Å)                            | 1.8 to 11.5  | 2.0 to 9.0   |
| <b>Refinement</b>                                   |              |              |
| Model resolution range (Å)                          | ∞ to 2.9     | ∞ to 3.8     |
| Map sharpening <i>B</i> factor (Å <sup>2</sup> )    | -79.0        | -95.4        |
| Model composition                                   |              |              |
| Non-hydrogen atoms                                  | 21,086       | 21,086       |
| Protein residues                                    | 2,542        | 2,542        |
| Ligands                                             | 57           | 56           |
| <i>B</i> factors (Å <sup>2</sup> )                  |              |              |
| Protein                                             | 58.0         | 72.0         |
| Ligand                                              | 84.0         | 92.0         |
| R.m.s. deviations                                   |              |              |
| Bond lengths (Å)                                    | 0.004        | 0.008        |
| Bond angles (°)                                     | 0.600        | 0.670        |
| Validation                                          |              |              |
| MolProbity score                                    | 2.42         | 2.52         |
| Clashscore                                          | 14           | 18           |
| Poor rotamers (%)                                   | 0.00         | 0.00         |
| Ramachandran plot                                   |              |              |
| Favored (%)                                         | 92.04        | 90.1         |
| Allowed (%)                                         | 7.76         | 9.4          |
| Disallowed (%)                                      | 0.2          | 0.5          |

**Supplementary Table 2. Interactions of nsp13 with nsp7-nsp8-nsp12 complex.**

| Molecule | Residue | Molecule | Residue       |
|----------|---------|----------|---------------|
| nsp13-1  | V45     | nsp8-1   | Q73           |
|          | N46     |          | Q73           |
|          | M68     |          | Q69           |
|          | I79     |          | M55, K58, L59 |
|          | S80     |          | L59           |
|          | F81     |          | L59, A63      |
|          | F90     |          | M67           |
|          | G91     |          | M67, M70      |
|          | L92     |          | M70, Y71      |
|          | Y93     |          | Y71           |
|          | V193    | nsp12    | H362          |
|          | Q194    |          | H362, S363    |
|          | H230    |          | R365          |
| nsp13-2  | R248    | nsp8-2   | D134          |
|          | Y253    |          | P133          |
|          | L256    |          | P178          |
|          | L92     | nsp12    | M902, Y903    |
|          | Y93     |          | D901, M902    |
|          | K94     |          | S904          |
|          | N95     |          | S904          |

**Supplementary Table 3. Interactions of nsp13-1 and nsp13-2.**

| Molecule | Residue | Molecule | Residue                      |
|----------|---------|----------|------------------------------|
| nsp13-1  | E244    | nsp13-2  | Y217                         |
|          | H245    |          | Y217, K218                   |
|          | Y246    |          | T216, K218                   |
|          | V247    |          | D160, Y211, T216, Y217, K218 |
|          | R248    |          | T216                         |
|          | T250    |          | T216                         |



## Supplementary References

- 1 Deng, Z. *et al.* Structural basis for the regulatory function of a complex zinc-binding domain in a replicative arterivirus helicase resembling a nonsense-mediated mRNA decay helicase. *Nucleic acids research* **42**, 3464-3477, doi:10.1093/nar/gkt1310 (2014).
- 2 Jia, Z. *et al.* Delicate structural coordination of the Severe Acute Respiratory Syndrome coronavirus Nsp13 upon ATP hydrolysis. *Nucleic acids research* **47**, 6538-6550, doi:10.1093/nar/gkz409 (2019).
